# Supplementary material
Source: MDPI journal article supplement (https://www.mdpi.com/2073-445X/13/2/210)
Supplement: s1 [file s1]

## Supplementary material

**Table S1.** Checklist of taxa from the nine studied wetlands.

| Family         | Taxa                                                                 | Biological types | Chorological types | MTG | BTH | TAR | BRG | GZE | GZN | TRN | TRC | MJN | Rarity | JORA 2012 | IUCN 2023 |
|----------------|----------------------------------------------------------------------|------------------|--------------------|-----|-----|-----|-----|-----|-----|-----|-----|-----|--------|-----------|-----------|
| Alismataceae   | <i>Alisma plantago-aquatica</i> L.                                   | Hel              | Paleotemp          | x   | x   | x   |     |     |     |     |     |     |        |           |           |
| Alismataceae   | <i>Baldellia ranunculoides</i> (L.) Parl.                            | Hydr             | Med-atl            |     | x   |     |     |     |     |     |     |     |        |           |           |
| Alismataceae   | <i>Damasonium alisma</i> Mill. subsp. <i>bourgaei</i> (Coss.) Maire  | Hel              | Ibero-Mor          |     | x   |     |     |     |     |     |     |     |        |           |           |
| Alliaceae      | <i>Allium chamaemoly</i> L.                                          | Geo              | Med                | x   |     | x   |     |     |     | x   |     |     |        |           |           |
| Alliaceae      | <i>Allium triquetrum</i> L.                                          | Geo              | Med                |     |     |     |     |     |     |     | x   |     |        |           |           |
| Amarathaceae   | <i>Beta vulgaris</i> L. subsp. <i>maritima</i> (L.) Ar-cag.          | Hem              | Med                |     |     | x   | x   | x   |     |     |     | x   |        |           |           |
| Amarathaceae   | <i>Chenopodium album</i> L.                                          | Th               | Subcosm            |     |     | x   | x   |     |     |     |     |     |        |           |           |
| Amaryllidaceae | <i>Narcissus tazetta</i> L.                                          | Geo              | Med                |     |     |     |     |     |     | x   | x   |     |        |           |           |
| Anacardiaceae  | <i>Pistacia lentiscus</i> L.                                         | Ph               | Med                |     |     |     |     | x   |     |     |     |     |        |           |           |
| Apiaceae       | <i>Bunium crassifolium</i> (Batt.) Batt.                             | Geo              | End Alg-Tun        | x   |     |     |     | x   |     |     | x   |     | R      | P         |           |
| Apiaceae       | <i>Daucus carota</i> L. subsp. <i>maximus</i> (Desf.) Ball           | Hem              | Paleotemp          |     |     |     |     |     |     |     |     | x   |        |           |           |
| Apiaceae       | <i>Eryngium campestre</i> L.                                         | Hem              | Med                | x   |     | x   | x   | x   | x   |     | x   |     |        |           |           |
| Apiaceae       | <i>Eryngium pusillum</i> L.                                          | Hydr             | Med                | x   | x   | x   | x   | x   |     | x   | x   |     | VR     |           |           |
| Apiaceae       | <i>Eryngium tricuspidatum</i> L. subsp. <i>bovei</i> (Boiss.) Breton | Hem              | End Alg-Tun        |     |     |     | x   |     | x   |     | x   | x   |        |           |           |
| Apiaceae       | <i>Eryngium triquetrum</i> Vahl subsp. <i>triquetrum</i>             | Hem              | Med                |     |     |     |     |     |     |     | x   |     |        |           |           |
| Apiaceae       | <i>Helosciadium crassipes</i> W.D.J. Koch                            | Hydr             | End Alg-Tun-Egy    | x   | x   |     |     |     |     |     |     |     | VR     |           |           |
| Apiaceae       | <i>Helosciadium nodiflorum</i> (L.) W.D.J. Koch                      | Hydr             | Paleotemp          | x   |     | x   |     |     | x   |     | x   |     |        |           |           |
| Apiaceae       | <i>Pimpinella lutea</i> Desf.                                        | Ch               | Med                | x   |     |     |     |     |     |     | x   |     |        |           |           |

|               |                                                                          |      |                 |   |   |   |   |   |   |   |   |   |  |  |  |
|---------------|--------------------------------------------------------------------------|------|-----------------|---|---|---|---|---|---|---|---|---|--|--|--|
| Apiaceae      | <i>Sanicula europaea</i> L.                                              | Geo  | Euras           | x |   |   |   |   |   |   |   |   |  |  |  |
| Apiaceae      | <i>Thapsia garganica</i> L.                                              | Hem  | Med             |   |   | x | x |   |   |   | x |   |  |  |  |
| Apiaceae      | <i>Torilis arvensis</i> (Huds.) Link                                     | Th   | Euri-Med        | x |   |   |   | x | x |   | x |   |  |  |  |
| Apiaceae      | <i>Torilis nodosa</i> (L.) Gaertn.                                       | Th   | Paleotemp       |   |   |   | x | x |   |   | x |   |  |  |  |
| Apiaceae      | <i>Torilis nodosa</i> (L.) Gaertn. subsp. <i>webbii</i> (Jury) Kerguélen | Th   | Circummed       |   |   | x |   | x |   |   |   |   |  |  |  |
| Apiaceae      | <i>Oenanthe globulosa</i> L.                                             | Geo  | Med             | x |   | x |   | x | x |   | x |   |  |  |  |
| Apiaceae      | <i>Oenanthe virgata</i> Poir.                                            | Hydr | End Alg-Tun-Mor |   | x | x |   |   |   |   | x |   |  |  |  |
| Apocynaceae   | <i>Nerium oleander</i> L.                                                | Ph   | Med             |   |   |   |   | x |   |   |   | x |  |  |  |
| Araceae       | <i>Arisarum vulgare</i> O. Targ. Tozz.                                   | Geo  | Med             |   | x | x |   | x |   | x |   | x |  |  |  |
| Araceae       | <i>Arum italicum</i> MilL.                                               | Geo  | Euri-Med        |   |   | x |   | x | x |   |   |   |  |  |  |
| Asphodelaceae | <i>Asphodelus ramosus</i> L. subsp. <i>ramosus</i>                       | Geo  | Med             | x | x |   |   |   |   | x | x |   |  |  |  |
| Asteraceae    | <i>Achyrophorus laevigatus</i> (L.) Talavera & M. Talavera               | Hem  | Med             |   |   |   |   |   | x |   |   |   |  |  |  |
| Asteraceae    | <i>Achyrophorus valdesii</i> J.M. Jiménez, M. Ángeles & al.              | Th   | Med             | x |   | x |   | x |   |   |   |   |  |  |  |
| Asteraceae    | <i>Anacyclus clavatus</i> (Desf.) Pers.                                  | Th   | Med             |   |   |   |   |   | x |   |   |   |  |  |  |
| Asteraceae    | <i>Andryala integrifolia</i> L.                                          | Hem  | Circummed       | x |   |   |   |   |   |   |   |   |  |  |  |
| Asteraceae    | <i>Arctotheca calendula</i> (L.) Levyns                                  | Th   | Intr            |   | x |   |   |   |   |   |   |   |  |  |  |
| Asteraceae    | <i>Bellis annua</i> L. subsp. <i>annua</i>                               | Th   | Med             | x | x | x | x | x | x | x | x | x |  |  |  |
| Asteraceae    | <i>Bellis sylvestris</i> Cirillo                                         | Hem  | Med             | x |   | x |   | x |   |   |   |   |  |  |  |
| Asteraceae    | <i>Carduus macrocephalus</i> Desf.                                       | Hem  | Med             |   |   |   |   | x |   |   |   | x |  |  |  |
| Asteraceae    | <i>Carlina involucrata</i> Poir.                                         | Hem  | Med             |   |   | x | x | x | x |   |   | x |  |  |  |
| Asteraceae    | <i>Carthamus caeruleus</i> L.                                            | Hem  | Med             | x |   |   | x | x |   |   |   |   |  |  |  |
| Asteraceae    | <i>Centaurea calcitrapa</i> L.                                           | Hem  | Euri-Med        | x | x | x | x | x | x | x | x | x |  |  |  |
| Asteraceae    | <i>Centaurea involucrata</i> Desf.                                       | Hem  | End Alg-Mor     |   |   |   | x |   |   |   |   |   |  |  |  |
| Asteraceae    | <i>Centaurea napifolia</i> L.                                            | Hem  | Med             |   |   | x | x | x |   |   |   |   |  |  |  |

|            |                                                                      |     |                 |   |   |   |   |   |   |   |   |   |  |  |  |
|------------|----------------------------------------------------------------------|-----|-----------------|---|---|---|---|---|---|---|---|---|--|--|--|
| Asteraceae | <i>Centaurea pullata</i> L.                                          | Hem | Med             |   |   |   | x | x |   |   | x | x |  |  |  |
| Asteraceae | <i>Centaurea solstitialis</i> L. subsp. <i>schouwii</i> (DC.) Gugler | Hem | End Alg-Tun-Itl |   |   |   | x |   |   |   |   |   |  |  |  |
| Asteraceae | <i>Centaurea sphaerocephala</i> L.                                   | Hem | Med             |   |   | x | x | x |   |   | x |   |  |  |  |
| Asteraceae | <i>Cichorium intybus</i> L. subsp. <i>intybus</i>                    | Hem | Euri-Med        | x |   | x | x | x | x | x | x | x |  |  |  |
| Asteraceae | <i>Cirsium scabrum</i> (Poir.) Bonnet & Bar-ratte                    | Hem | Med             |   |   |   |   |   |   |   | x |   |  |  |  |
| Asteraceae | <i>Cladanthus mixtus</i> (L.) Chevall.                               | Th  | Circummed       |   |   | x | x | x | x |   |   |   |  |  |  |
| Asteraceae | <i>Cotula coronopifolia</i> L.                                       | Th  | Natu            | x | x |   |   |   |   |   |   |   |  |  |  |
| Asteraceae | <i>Crepis vesicaria</i> L.                                           | Hem | Euri-Med        | x |   | x | x | x |   |   |   |   |  |  |  |
| Asteraceae | <i>Dittrichia graveolens</i> (L.) Greuter                            | Th  | Euri-Med        | x |   | x |   | x |   |   |   |   |  |  |  |
| Asteraceae | <i>Dittrichia viscosa</i> (L.) Greuter                               | Ph  | Med             | x |   |   |   | x |   |   |   |   |  |  |  |
| Asteraceae | <i>Echinops bovei</i> Boiss.                                         | Hem | Med             |   |   |   | x |   |   |   | x |   |  |  |  |
| Asteraceae | <i>Erigeron bonariensis</i> L.                                       | Th  | Intr            | x |   |   |   |   |   |   |   |   |  |  |  |
| Asteraceae | <i>Erigeron canadensis</i> L.                                        | Th  | Intr            | x |   | x |   | x |   |   |   |   |  |  |  |
| Asteraceae | <i>Filago gallica</i> L.                                             | Th  | Euri-Med        | x |   | x | x | x | x |   |   |   |  |  |  |
| Asteraceae | <i>Filago pygmaea</i> L.                                             | Th  | Circummed       |   |   |   | x |   | x |   | x |   |  |  |  |
| Asteraceae | <i>Galactites mutabilis</i> Durieu                                   | Th  | End Alg-Tun     | x |   | x | x | x |   |   | x | x |  |  |  |
| Asteraceae | <i>Galactites tomentosus</i> Moench                                  | Th  | Med             | x | x |   |   | x |   |   |   |   |  |  |  |
| Asteraceae | <i>Glebionis segetum</i> (L.) Fourr.                                 | Th  | Euri-Med        |   |   |   | x |   |   | x | x |   |  |  |  |
| Asteraceae | <i>Helminthotheca echioides</i> (L.) Holub                           | Hem | Circummed       | x |   | x | x | x |   | x | x | x |  |  |  |
| Asteraceae | <i>Hyoseris radiata</i> L.                                           | Hem | Med             | x |   |   |   | x |   | x | x |   |  |  |  |
| Asteraceae | <i>Hyoseris scabra</i> L.                                            | Th  | Med             | x |   |   |   |   | x |   | x |   |  |  |  |
| Asteraceae | <i>Hypochaeris glabra</i> L.                                         | Th  | Med             |   | x | x | x |   |   |   |   |   |  |  |  |
| Asteraceae | <i>Hypochaeris radicata</i> L.                                       | Hem | Euri-Med        | x |   | x | x |   | x |   | x | x |  |  |  |
| Asteraceae | <i>Lactuca serriola</i> L.                                           | Th  | Subcosm         |   |   | x |   |   |   |   |   |   |  |  |  |
| Asteraceae | <i>Leontodon tuberosus</i> L.                                        | Hem | Med             | x | x |   |   | x | x | x | x |   |  |  |  |



|                 |                                                    |     |                 |   |   |   |   |   |   |   |   |   |    |   |    |
|-----------------|----------------------------------------------------|-----|-----------------|---|---|---|---|---|---|---|---|---|----|---|----|
| Brassicaceae    | <i>Sisymbrium irio</i> L.                          | Th  | Paleotemp       |   |   |   |   | x | x | x | x | x |    |   |    |
| Brassicaceae    | <i>Raphanus raphanistrum</i> L.                    | Th  | Circummed       |   |   |   |   |   |   |   | x |   |    |   |    |
| Campanulaceae   | <i>Campanula rapunculus</i> L.                     | Hem | Euri-Med        | x |   |   |   |   |   |   |   |   |    |   |    |
| Campanulaceae   | <i>Solenopsis bicolor</i> (Batt.) Greuter & Burdet | Th  | End Alg-Tun     |   | x |   |   |   |   |   |   |   |    |   | NT |
| Campanulaceae   | <i>Solenopsis laurentia</i> (L.) C. Presl          | Th  | Circummed       |   | x |   |   |   |   |   |   |   |    |   |    |
| Caprifoliaceae  | <i>Fedia graciliflora</i> Fisch. & C.A. Mey.       | Th  | Med             |   |   |   |   |   |   |   | x |   |    |   |    |
| Caryophyllaceae | <i>Arenaria cerastioides</i> Poir.                 | Th  | End Alg-Tun-Mor |   | x | x |   |   |   |   | x |   |    |   |    |
| Caryophyllaceae | <i>Illecebrum verticillatum</i> L.                 | Th  | Euri-Med        |   |   |   |   |   | x |   |   |   | VR | P |    |
| Caryophyllaceae | <i>Stellaria media</i> (L.) Vill.                  | Th  | Subcosm         |   |   |   | x |   |   |   |   |   |    |   |    |
| Caryophyllaceae | <i>Cerastium glomeratum</i> Thuill.                | Th  | Cosm            |   |   | x | x |   |   |   | x |   |    |   |    |
| Caryophyllaceae | <i>Silene coelirosa</i> (L.) Godr.                 | Th  | Med             | x | x | x |   |   |   |   |   |   |    |   |    |
| Caryophyllaceae | <i>Silene colorata</i> Poir.                       | Th  | Euri-Med        |   |   | x |   |   |   |   | x |   |    |   |    |
| Caryophyllaceae | <i>Silene fuscata</i> Link ex Brot.                | Th  | Med             | x |   |   |   |   |   |   |   |   |    |   |    |
| Caryophyllaceae | <i>Silene gallica</i> L.                           | Th  | Subcosm         | x |   |   |   |   |   |   |   |   |    |   |    |
| Caryophyllaceae | <i>Silene laeta</i> (Aiton) A. Braun               | Geo | Circummed       |   | x |   |   |   |   |   |   |   |    |   |    |
| Caryophyllaceae | <i>Silene neglecta</i> Ten.                        | Th  | Med             |   |   |   | x |   |   |   |   | x |    |   |    |
| Caryophyllaceae | <i>Silene nocturna</i> L.                          | Th  | Paleotemp       |   |   |   | x |   |   |   |   | x |    |   |    |
| Caryophyllaceae | <i>Silene scabrida</i> Soy.-Will. & Godr.          | Th  | End Alg         |   |   |   |   |   |   |   | x |   | R  |   |    |
| Caryophyllaceae | <i>Paronychia arabica</i> (L.) DC.                 | Hem | Med             |   |   |   | x | x |   |   |   |   |    |   |    |
| Caryophyllaceae | <i>Paronychia argentea</i> Lam.                    | Hem | Med             |   |   |   |   |   | x | x | x |   |    |   |    |
| Cistaceae       | <i>Cistus monspeliensis</i> L.                     | Ph  | Med             | x | x |   |   |   |   |   |   |   |    |   |    |
| Cistaceae       | <i>Cistus salvifolius</i> L.                       | Ph  | Med             | x |   |   |   |   |   |   |   |   |    |   |    |
| Convolvulaceae  | <i>Cuscuta epithymum</i> (L.) L.                   | Th  | Med             | x |   |   |   | x |   |   |   |   |    |   |    |
| Convolvulaceae  | <i>Convolvulus arvensis</i> L.                     | Geo | Subcosm         |   |   | x |   | x | x |   |   |   |    |   |    |
| Convolvulaceae  | <i>Convolvulus tricolor</i> L.                     | Th  | Med             |   |   |   | x |   |   |   |   |   |    |   |    |

|                  |                                                                           |     |                     |   |   |   |  |   |   |  |   |   |  |  |  |
|------------------|---------------------------------------------------------------------------|-----|---------------------|---|---|---|--|---|---|--|---|---|--|--|--|
| Crassulaceae     | <i>Crassula alata</i> (Viv.) A. Berger                                    | Th  | Med                 |   |   |   |  |   |   |  | x |   |  |  |  |
| Crassulaceae     | <i>Umbilicus rupestris</i> (Salisb.) Dandy                                | Geo | Med-atl             |   | x |   |  |   |   |  |   |   |  |  |  |
| Cyperaceae       | <i>Carex pendula</i> Huds.                                                | Hem | Paleotemp           |   |   | x |  |   |   |  |   |   |  |  |  |
| Cyperaceae       | <i>Carex remota</i> L.                                                    | Hem | Med                 | x | x | x |  | x |   |  |   |   |  |  |  |
| Cyperaceae       | <i>Cyperus rotundus</i> L. subsp. <i>rotundus</i>                         | Geo | Trop                | x |   | x |  | x |   |  |   |   |  |  |  |
| Cyperaceae       | <i>Pycnus flavescens</i> (L.) P. Beauv. ex Rchb. subsp. <i>flavescens</i> | Hem | Med                 |   |   | x |  |   |   |  |   |   |  |  |  |
| Cyperaceae       | <i>Schoenus nigricans</i> L.                                              | Hem | Subcosm             |   | x |   |  | x | x |  |   |   |  |  |  |
| Dennstaedtiaceae | <i>Pteridium aquilinum</i> (L.) Kuhn                                      | Geo | Cosm                |   | x |   |  |   |   |  |   |   |  |  |  |
| Dioscoreaceae    | <i>Dioscorea communis</i> (L.) Caddick & Wilkin                           | Hem | Med                 |   | x |   |  |   |   |  |   |   |  |  |  |
| Dipsacaceae      | <i>Lomelosia stellata</i> (L.) Raf.                                       | Th  | Med                 |   |   |   |  | x |   |  |   |   |  |  |  |
| Dipsacaceae      | <i>Sixalix atropurpurea</i> (L.) Greuter & Burdet                         | Hem | Med                 |   |   |   |  |   |   |  | x |   |  |  |  |
| Equisetaceae     | <i>Equisetum ramosissimum</i> Desf.                                       | Hem | Trop                |   |   |   |  | x |   |  |   |   |  |  |  |
| Ericaceae        | <i>Erica arborea</i> L.                                                   | Ph  | Med                 | x | x |   |  |   |   |  |   |   |  |  |  |
| Euphorbiaceae    | <i>Euphorbia helioscopia</i> L. subsp. <i>helioscopia</i>                 | Th  | Med                 | x | x |   |  |   |   |  |   | x |  |  |  |
| Euphorbiaceae    | <i>Euphorbia peplus</i> L.                                                | Th  | Euri-Med            |   |   |   |  |   |   |  | x |   |  |  |  |
| Euphorbiaceae    | <i>Euphorbia terracina</i> L.                                             | Ch  | Circummed           |   |   |   |  |   |   |  | x |   |  |  |  |
| Fabaceae         | <i>Ornithopus compressus</i> L.                                           | Th  | Med                 |   |   |   |  |   |   |  |   | x |  |  |  |
| Fabaceae         | <i>Calicotome spinosa</i> (L.) Link                                       | Ph  | Med                 |   | x |   |  | x |   |  |   |   |  |  |  |
| Fabaceae         | <i>Calicotome villosa</i> (Poir.) Link                                    | Ph  | Med                 | x | x |   |  |   |   |  |   |   |  |  |  |
| Fabaceae         | <i>Cytisus monspessulanus</i> L.                                          | Ph  | Med                 | x |   |   |  |   |   |  |   |   |  |  |  |
| Fabaceae         | <i>Cytisus villosus</i> Pourr.                                            | Ph  | Med                 | x |   |   |  |   |   |  | x |   |  |  |  |
| Fabaceae         | <i>Ebenus pinnata</i> Aiton                                               | Hem | End Alg-Tun-Mor-Lib |   |   |   |  | x |   |  |   |   |  |  |  |
| Fabaceae         | <i>Hedysarum coronarium</i> L.                                            | Hem | Med                 |   |   |   |  | x |   |  |   |   |  |  |  |
| Fabaceae         | <i>Hedysarum spinosissimum</i> L.                                         | Th  | Med                 |   |   |   |  | x |   |  | x |   |  |  |  |

|          |                                                                        |     |           |   |   |   |   |   |   |   |   |   |  |  |  |
|----------|------------------------------------------------------------------------|-----|-----------|---|---|---|---|---|---|---|---|---|--|--|--|
| Fabaceae | <i>Lotus corniculatus</i> L. subsp. <i>corniculatus</i>                | Th  | Euri-Med  | x |   | x | x | x | x | x | x | x |  |  |  |
| Fabaceae | <i>Lotus corniculatus</i> L. subsp. <i>preslii</i> (Ten.)<br>P. Fourn. | Th  | Euri-Med  | x | x |   |   |   |   |   |   |   |  |  |  |
| Fabaceae | <i>Lotus parviflorus</i> Desf.                                         | Th  | Med       |   |   | x |   |   |   |   |   |   |  |  |  |
| Fabaceae | <i>Lotus subbiflorus</i> Lag.                                          | Th  | Med-atl   | x |   |   | x | x |   |   | x |   |  |  |  |
| Fabaceae | <i>Lupinus micranthus</i> Guss.                                        | Th  | Circummed | x |   |   |   |   |   |   |   |   |  |  |  |
| Fabaceae | <i>Medicago arabica</i> (L.) Huds.                                     | Th  | Euri-Med  | x |   | x | x | x |   |   | x | x |  |  |  |
| Fabaceae | <i>Medicago intertexta</i> (L.) Mill.                                  | Th  | Med       |   |   |   |   | x |   |   |   |   |  |  |  |
| Fabaceae | <i>Medicago murex</i> Willd.                                           | Th  | Med       | x | x | x | x | x |   |   |   | x |  |  |  |
| Fabaceae | <i>Medicago orbicularis</i> (L.) Bartal.                               | Th  | Euri-Med  |   |   | x |   |   |   |   |   |   |  |  |  |
| Fabaceae | <i>Medicago polymorpha</i> L.                                          | Th  | Subcosm   |   |   | x |   | x | x | x | x | x |  |  |  |
| Fabaceae | <i>Medicago sativa</i> L.                                              | Hem | Cult      |   |   | x |   |   |   |   |   |   |  |  |  |
| Fabaceae | <i>Medicago truncatula</i> Gaertn.                                     | Th  | Med       |   |   | x |   |   | x |   | x |   |  |  |  |
| Fabaceae | <i>Melilotus indicus</i> (L.) All.                                     | Th  | Paleotemp | x |   | x |   |   |   |   |   | x |  |  |  |
| Fabaceae | <i>Ononis hispida</i> Desf.                                            | Ch  | Med       |   |   |   |   | x |   |   |   |   |  |  |  |
| Fabaceae | <i>Scorpiurus muricatus</i> L. subsp. <i>muricatus</i>                 | Th  | Euri-Med  | x |   |   |   | x |   |   |   |   |  |  |  |
| Fabaceae | <i>Tetragonolobus biflorus</i> (Desr.) DC.                             | Th  | Med       |   |   |   |   | x |   |   |   |   |  |  |  |
| Fabaceae | <i>Tetragonolobus purpureus</i> Moench                                 | Th  | Med       |   |   |   | x |   |   |   |   |   |  |  |  |
| Fabaceae | <i>Trifolium angustifolium</i> L.                                      | Th  | Med       | x |   |   | x | x |   |   | x |   |  |  |  |
| Fabaceae | <i>Trifolium arvense</i> L.                                            | Th  | Paleotemp | x | x | x | x | x |   | x | x |   |  |  |  |
| Fabaceae | <i>Trifolium campestre</i> Schreb.                                     | Th  | Paleotemp | x |   | x | x | x |   |   |   |   |  |  |  |
| Fabaceae | <i>Trifolium glomeratum</i> L.                                         | Th  | Paleotemp | x |   |   | x |   | x |   |   |   |  |  |  |
| Fabaceae | <i>Trifolium ligusticum</i> Loisel.                                    | Th  | Med       | x |   |   | x | x | x |   |   | x |  |  |  |
| Fabaceae | <i>Trifolium pratense</i> L.                                           | Hem | Paleotemp | x |   | x |   | x |   |   | x |   |  |  |  |
| Fabaceae | <i>Trifolium repens</i> L.                                             | Hem | Paleotemp | x |   | x | x | x | x | x | x | x |  |  |  |
| Fabaceae | <i>Trifolium resupinatum</i> L.                                        | Th  | Med       |   |   |   | x |   |   |   |   |   |  |  |  |
| Fabaceae | <i>Trifolium stellatum</i> L.                                          | Th  | Med       |   |   | x |   | x | x |   |   |   |  |  |  |

[illegible]



|            |                                                                                                  |      |                 |   |   |   |   |   |   |   |   |   |   |   |    |
|------------|--------------------------------------------------------------------------------------------------|------|-----------------|---|---|---|---|---|---|---|---|---|---|---|----|
| Iridaceae  | <i>Romulea ramiflora</i> Ten.                                                                    | Geo  | Med             | x |   |   |   |   |   |   |   |   |   |   |    |
| Isoetaceae | <i>Isoetes histrix</i> Durieu ex Bory                                                            | Hem  | Euri-Med        | x | x | x |   | x | x |   |   |   |   |   |    |
| Juncaceae  | <i>Juncus acutus</i> L.                                                                          | Hem  | Med             |   |   |   | x | x |   |   | x | x |   |   |    |
| Juncaceae  | <i>Juncus bufonius</i> L.                                                                        | Th   | Cosm            |   |   |   | x |   |   |   | x | x |   |   |    |
| Juncaceae  | <i>Juncus effusus</i> L.                                                                         | Hem  | Subcosm         | x |   | x | x | x | x | x | x |   |   |   |    |
| Juncaceae  | <i>Juncus heterophyllus</i> Dufour                                                               | Hydr | Med             | x | x | x |   |   |   |   |   |   | R |   | NT |
| Juncaceae  | <i>Juncus tenageia</i> L. f. subsp. <i>tenageia</i>                                              | Th   | Paleotemp       |   | x |   |   |   |   |   |   |   |   |   |    |
| Juncaceae  | <i>Luzula multiflora</i> (Ehrh.) Lej.                                                            | Hem  | Med             | x |   |   |   |   |   |   |   |   | R |   |    |
| Lamiaceae  | <i>Ajuga iva</i> (L.) Schreb. subsp. <i>iva</i>                                                  | Ch   | Med             | x |   |   |   | x | x |   |   |   |   |   |    |
| Lamiaceae  | <i>Lamium amplexicaule</i> L.                                                                    | Th   | Holar           |   | x |   |   |   |   |   | x |   |   |   |    |
| Lamiaceae  | <i>Lycopus europaeus</i> L.                                                                      | Hem  | Euri-Med        |   | x |   |   |   |   |   |   |   |   |   |    |
| Lamiaceae  | <i>Micromeria graeca</i> (L.) Benth. ex Rchb.                                                    | Ch   | Med             |   |   |   | x | x |   |   |   |   |   |   |    |
| Lamiaceae  | <i>Origanum vulgare</i> L. subsp. <i>glandulosum</i> (Desf.) Ietsw.                              | Ch   | End Alg-Tun     |   |   |   |   |   |   |   | x |   |   |   |    |
| Lamiaceae  | <i>Phlomis bovei</i> de Noé                                                                      | Ch   | End Alg-Tun-Mor |   |   |   |   |   |   |   | x |   | R | P |    |
| Lamiaceae  | <i>Stachys duriaei</i> de Noé                                                                    | Th   | End Alg Tun     |   |   |   |   | x |   |   |   |   |   |   |    |
| Lamiaceae  | <i>Teucrium polium</i> L.                                                                        | Ch   | Med             |   |   |   | x |   |   |   |   |   |   |   |    |
| Lamiaceae  | <i>Thymus munbyanus</i> Boiss. & Reut. subsp. <i>coloratus</i> (Boiss. & Reut.) Greuter & Burdet | Ch   | End Alg-Tun-Mor |   |   |   |   |   | x |   |   |   |   |   |    |
| Lamiaceae  | <i>Calamintha menthifolia</i> Host                                                               | Ch   | Med             | x |   |   |   |   |   |   |   |   | R |   |    |
| Lamiaceae  | <i>Clinopodium vulgare</i> L.                                                                    | Hem  | Holar           | x |   |   |   |   |   |   | x |   |   |   |    |
| Lamiaceae  | <i>Morrubium vulgare</i> L.                                                                      | Ch   | Euras           |   |   |   | x | x |   |   |   |   |   |   |    |
| Lamiaceae  | <i>Mentha aquatica</i> L.                                                                        | Hem  | Subcosm         | x |   | x |   | x |   | x |   |   |   |   |    |
| Lamiaceae  | <i>Mentha pulegium</i> L.                                                                        | Hem  | Euri-Med        | x | x | x | x | x | x |   | x | x |   |   |    |
| Lamiaceae  | <i>Prunella vulgaris</i> L.                                                                      | Hem  | Holar           | x | x |   |   |   |   |   |   |   |   |   |    |
| Lamiaceae  | <i>Salvia verbenaca</i> L.                                                                       | Hem  | Med-atl         |   |   |   | x | x |   |   |   |   |   |   |    |

|                 |                                                                                            |      |             |   |   |   |   |   |   |   |   |   |     |  |    |
|-----------------|--------------------------------------------------------------------------------------------|------|-------------|---|---|---|---|---|---|---|---|---|-----|--|----|
| Lemnaceae       | <i>Lemna minor</i> L.                                                                      | Hydr | Subcosm     |   |   | x | x |   |   |   |   | x |     |  |    |
| Linaceae        | <i>Linum bienne</i> Mill.                                                                  | Th   | Med-atl     | x |   |   |   | x |   |   | x | x |     |  |    |
| Lythraceae      | <i>Lythrum junceum</i> Banks & Sol.                                                        | Geo  | Med         | x |   | x |   | x |   |   |   |   |     |  |    |
| Malvaceae       | <i>Malva neglecta</i> Wallr.                                                               | Th   | Paleotemp   |   |   |   |   | x |   |   |   |   |     |  |    |
| Malvaceae       | <i>Malva sylvestris</i> L.                                                                 | Hem  | Paleotemp   |   |   | x |   |   |   |   | x | x |     |  |    |
| Malvaceae       | <i>Malva trimestris</i> (L.) Salisb.                                                       | Hem  | Euri-Med    |   |   |   | x |   | x |   |   |   |     |  |    |
| Myrtaceae       | <i>Myrtus communis</i> L.                                                                  | Ph   | Med         | x | x |   |   |   |   |   |   |   |     |  |    |
| Oleaceae        | <i>Fraxinus angustifolia</i> Vahl                                                          | Ph   | Euri-Med    |   |   | x |   |   |   |   |   |   |     |  |    |
| Oleaceae        | <i>Olea europaea</i> L.                                                                    | Ph   | Med         |   |   |   |   | x |   |   |   |   |     |  |    |
| Oleaceae        | <i>Phillyrea latifolia</i> L.                                                              | Ph   | Med         | x |   |   |   |   |   |   |   |   |     |  |    |
| Orchidaceae     | <i>Ophrys tenthredinifera</i> Willd. subsp. <i>tenthredinifera</i>                         | Geo  | Med         | x |   |   |   |   |   |   |   |   |     |  |    |
| Orchidaceae     | <i>Orchis italica</i> Poir.                                                                | Geo  | Circummed   |   |   |   |   | x |   |   |   |   |     |  |    |
| Orchidaceae     | <i>Serapias lingua</i> L. subsp. <i>stenopetala</i> (Maire & T. Stephenson) Maire & Weiler | Geo  | End Alg-Tun |   | x |   |   |   |   |   |   |   | RR* |  | CR |
| Orchidaceae     | <i>Serapias parviflora</i> Parl.                                                           | Geo  | Med         |   | x |   |   |   |   |   |   |   |     |  |    |
| Orchidaceae     | <i>Serapias strictiflora</i> Welw. ex Veiga                                                | Geo  | Med         | x | x |   |   |   |   |   |   |   |     |  |    |
| Orobanchaceae   | <i>Bartsia trixago</i> L.                                                                  | Th   | Circummed   |   |   |   | x | x |   |   | x | x |     |  |    |
| Orobanchaceae   | <i>Phelipanche nana</i> (Noë ex Rchb. f.) Soják                                            | Th   | Med         | x |   |   |   |   |   |   |   |   |     |  |    |
| Oxalidaceae     | <i>Oxalis corniculata</i> L. subsp. <i>corniculata</i>                                     | Geo  | Cosm        |   | x |   |   |   |   |   |   |   |     |  |    |
| Oxalidaceae     | <i>Oxalis pes-caprae</i> L.                                                                | Geo  | Intr        |   |   |   |   |   |   |   |   | x |     |  |    |
| Papaveraceae    | <i>Fumaria bastardii</i> Boreau                                                            | Th   | Circummed   |   |   |   |   |   |   |   | x |   |     |  |    |
| Plantagianaceae | <i>Callitriche obtusangula</i> Le Gall                                                     | Hydr | Med-atl     |   | x | x |   |   |   |   |   |   |     |  |    |
| Plantaginaceae  | <i>Kickxia commutata</i> (Bernh. ex Rchb.) Fritsch                                         | Th   | Med         | x |   |   |   |   |   |   |   |   |     |  |    |
| Plantaginaceae  | <i>Linaria reflexa</i> (L.) Chaz.                                                          | Th   | Med         | x |   |   |   |   | x | x | x |   |     |  |    |
| Plantaginaceae  | <i>Plantago afra</i> L.                                                                    | Th   | Paleotemp   |   |   |   | x | x |   | x |   |   |     |  |    |

|                |                                                                        |     |             |   |   |   |   |   |   |   |   |   |  |  |  |
|----------------|------------------------------------------------------------------------|-----|-------------|---|---|---|---|---|---|---|---|---|--|--|--|
| Plantaginaceae | <i>Plantago albicans</i> L.                                            | Hem | Med         |   |   |   | x | x |   |   |   |   |  |  |  |
| Plantaginaceae | <i>Plantago lagopus</i> L.                                             | Th  | Med         | x |   | x | x | x |   |   | x | x |  |  |  |
| Plantaginaceae | <i>Plantago lanceolata</i> L.                                          | Hem | Paleotemp   | x | x | x | x | x | x | x | x | x |  |  |  |
| Plantaginaceae | <i>Plantago major</i> L.                                               | Hem | Holar       | x |   | x | x | x | x | x | x | x |  |  |  |
| Plantaginaceae | <i>Plantago ovata</i> Forssk.                                          | Th  | Med         |   |   | x |   |   |   |   |   |   |  |  |  |
| Plantaginaceae | <i>Plantago serraria</i> L.                                            | Hem | Med         | x |   | x | x | x | x | x | x | x |  |  |  |
| Plantaginaceae | <i>Veronica anagallis-aquatica</i> L. subsp. <i>anagallis-aquatica</i> | Hel | Subcosm     |   | x | x |   |   |   |   |   |   |  |  |  |
| Plumbaginaceae | <i>Plumbago europaea</i> L.                                            | Ch  | Med         |   |   |   |   |   |   |   |   | x |  |  |  |
| Poaceae        | <i>Briza maxima</i> L.                                                 | Th  | Med         | x |   |   | x |   |   |   |   | x |  |  |  |
| Poaceae        | <i>Briza minor</i> L.                                                  | Th  | Med-atl     | x |   | x | x |   |   |   | x |   |  |  |  |
| Poaceae        | <i>Cynodon dactylon</i> (L.) Pers.                                     | Hem | Cosm        | x | x | x | x | x | x | x | x | x |  |  |  |
| Poaceae        | <i>Cynosurus echinatus</i> L.                                          | Th  | Med-atl     |   |   |   | x |   |   | x |   |   |  |  |  |
| Poaceae        | <i>Cynosurus polybracteatus</i> Poir.                                  | Th  | End Alg-Tun | x | x |   |   |   |   | x |   |   |  |  |  |
| Poaceae        | <i>Dactylis glomerata</i> L. subsp. <i>glomerata</i>                   | Hem | Euras       | x | x |   | x | x |   |   | x |   |  |  |  |
| Poaceae        | <i>Digitaria sanguinalis</i> (L.) Scop.                                | Th  | Subcosm     | x |   |   |   |   |   |   |   |   |  |  |  |
| Poaceae        | <i>Lagurus ovatus</i> L.                                               | Th  | Med-atl     |   | x |   |   |   |   |   |   |   |  |  |  |
| Poaceae        | <i>Lamarckia aurea</i> (L.) Moench                                     | Th  | Med         |   |   |   | x |   |   |   |   |   |  |  |  |
| Poaceae        | <i>Lolium perenne</i> L.                                               | Hem | Euri-Med    | x |   | x | x | x | x | x | x |   |  |  |  |
| Poaceae        | <i>Molineriella minuta</i> (L.) Rouy                                   | Th  | Med         | x |   |   |   |   |   |   |   |   |  |  |  |
| Poaceae        | <i>Rostraria cristata</i> (L.) Tzvelev                                 | Th  | Subcosm     | x |   |   |   | x | x |   |   | x |  |  |  |
| Poaceae        | <i>Aegilops triuncialis</i> L.                                         | Th  | Euri-Med    |   |   |   |   | x | x |   |   |   |  |  |  |
| Poaceae        | <i>Agrostis stolonifera</i> L.                                         | Hem | Holar       |   | x |   | x | x |   |   |   | x |  |  |  |
| Poaceae        | <i>Anisantha madritensis</i> (L.) Nevski                               | Th  | Med         |   |   |   |   | x |   |   |   |   |  |  |  |
| Poaceae        | <i>Anisantha rubens</i> (L.) Nevski                                    | Th  | Med         |   |   |   | x | x |   |   |   | x |  |  |  |
| Poaceae        | <i>Bromus hordeaceus</i> L.                                            | Th  | Paleotemp   |   |   |   |   | x |   | x |   |   |  |  |  |
| Poaceae        | <i>Catapodium rigidum</i> (L.) C.E. Hubb.                              | Th  | Med         |   | x | x |   |   | x |   | x | x |  |  |  |



[illegible]



x: presence; Th: Therophyte; Hem: Hemicryptophyte; Ch: Chamaephyte; Geo: Geophyte; Ph: Phanerophyte; Hydr: Hydrophyte; Med: Mediterranean; Euri-Med: Euri-Mediterranean; Circummed: Circummediterranean; Med-atl: Mediterranean-atlantic; Eura: Eurasian; Trop: Tropical; Paleotem: Paleotemperate; Holar: Holarctic; Cosm: Cosmopolitan; subcosm: subcosmopolitan; Subend Tyrrh: Subend. Tyrrhenian; Ibero-Mar: Ibero-maghrebian; Intr: introduced; Cult: cultivated; Natu: naturalized; End: Endemic; Subend: Subendemic; Alg: Algeria; Tun: Tunisia; Mor: Morocco; Lib: Libya; Egy: Egypt; Itl: Italy; Spa: Spain; NT: Near-Threatened; CR: Critically Endangered; P: Protected; R: Rare; VR: Very Rare; (\*): modified rarity.
